# Supplementary material for: Regulation of BDNF transcription by Nrf2 and MeCP2 ameliorates MPTP-induced neurotoxicity
Source: PubMed Central journal article supplement (PMC9122988; doi:10.1038/s41420-022-01063-9), 2022-05-20

Figure 1E

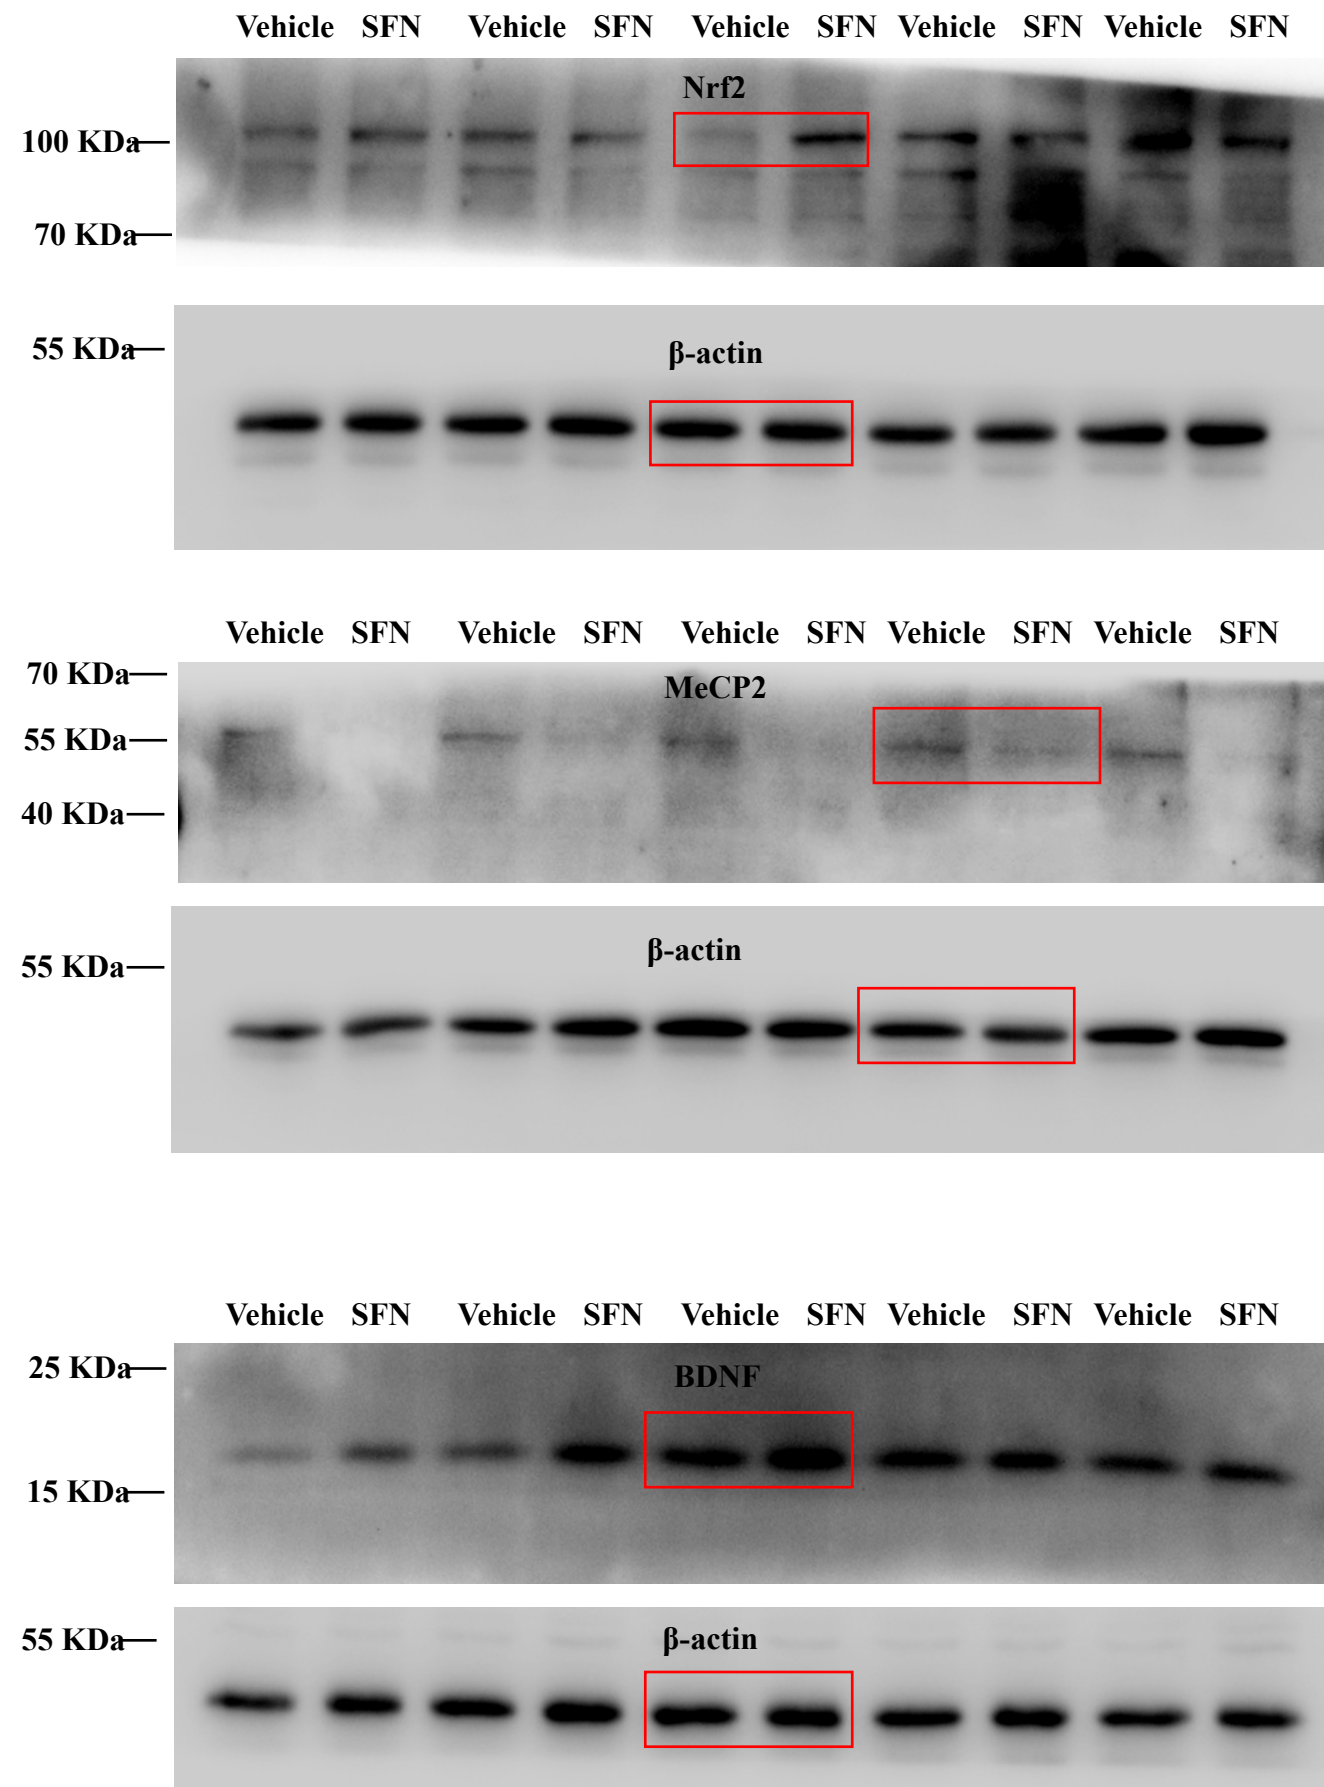

Figure 2A

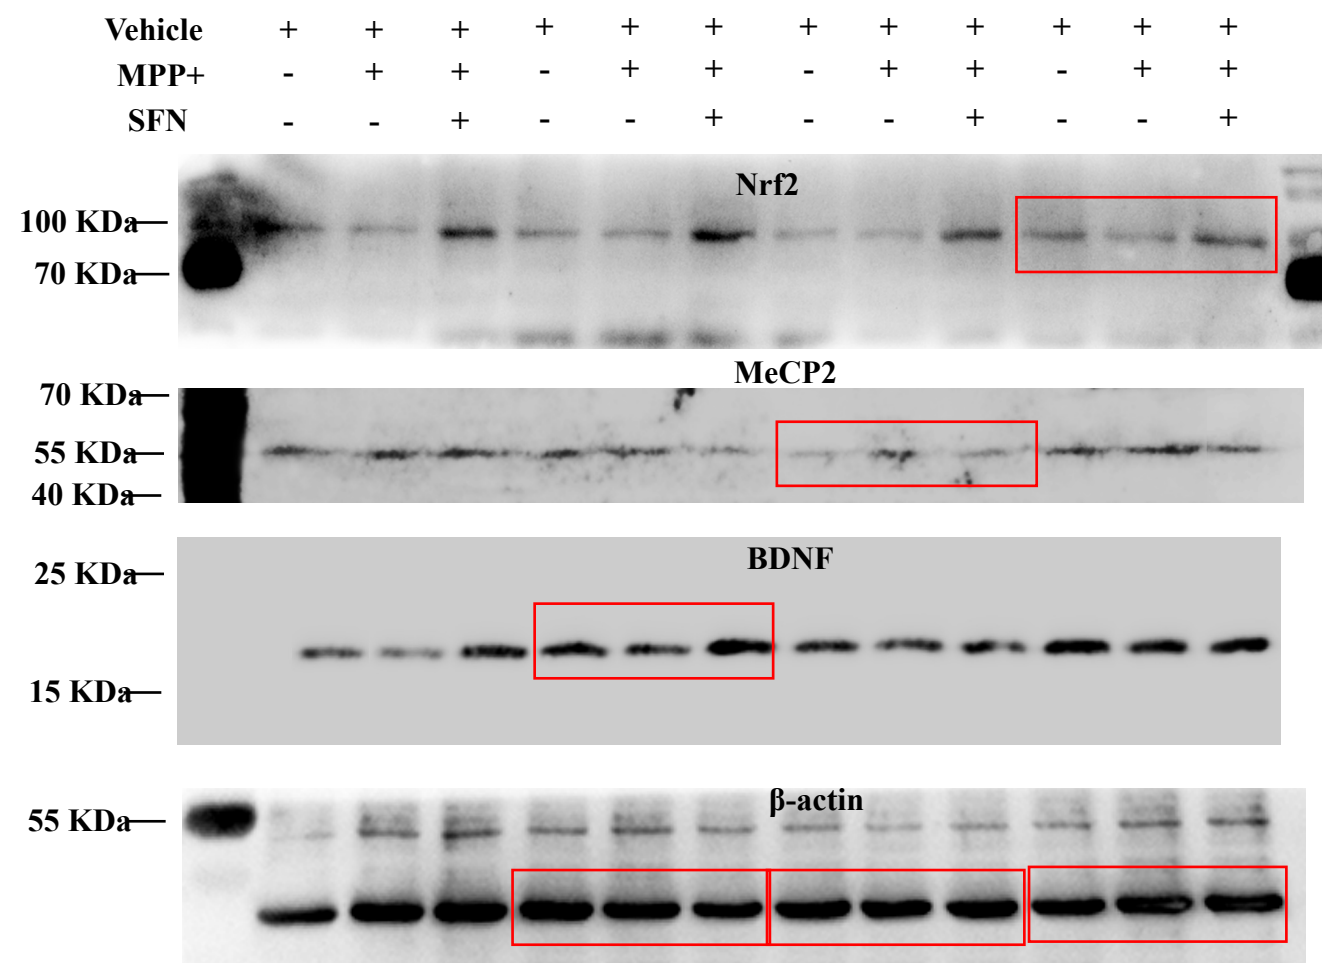

Figure 3F

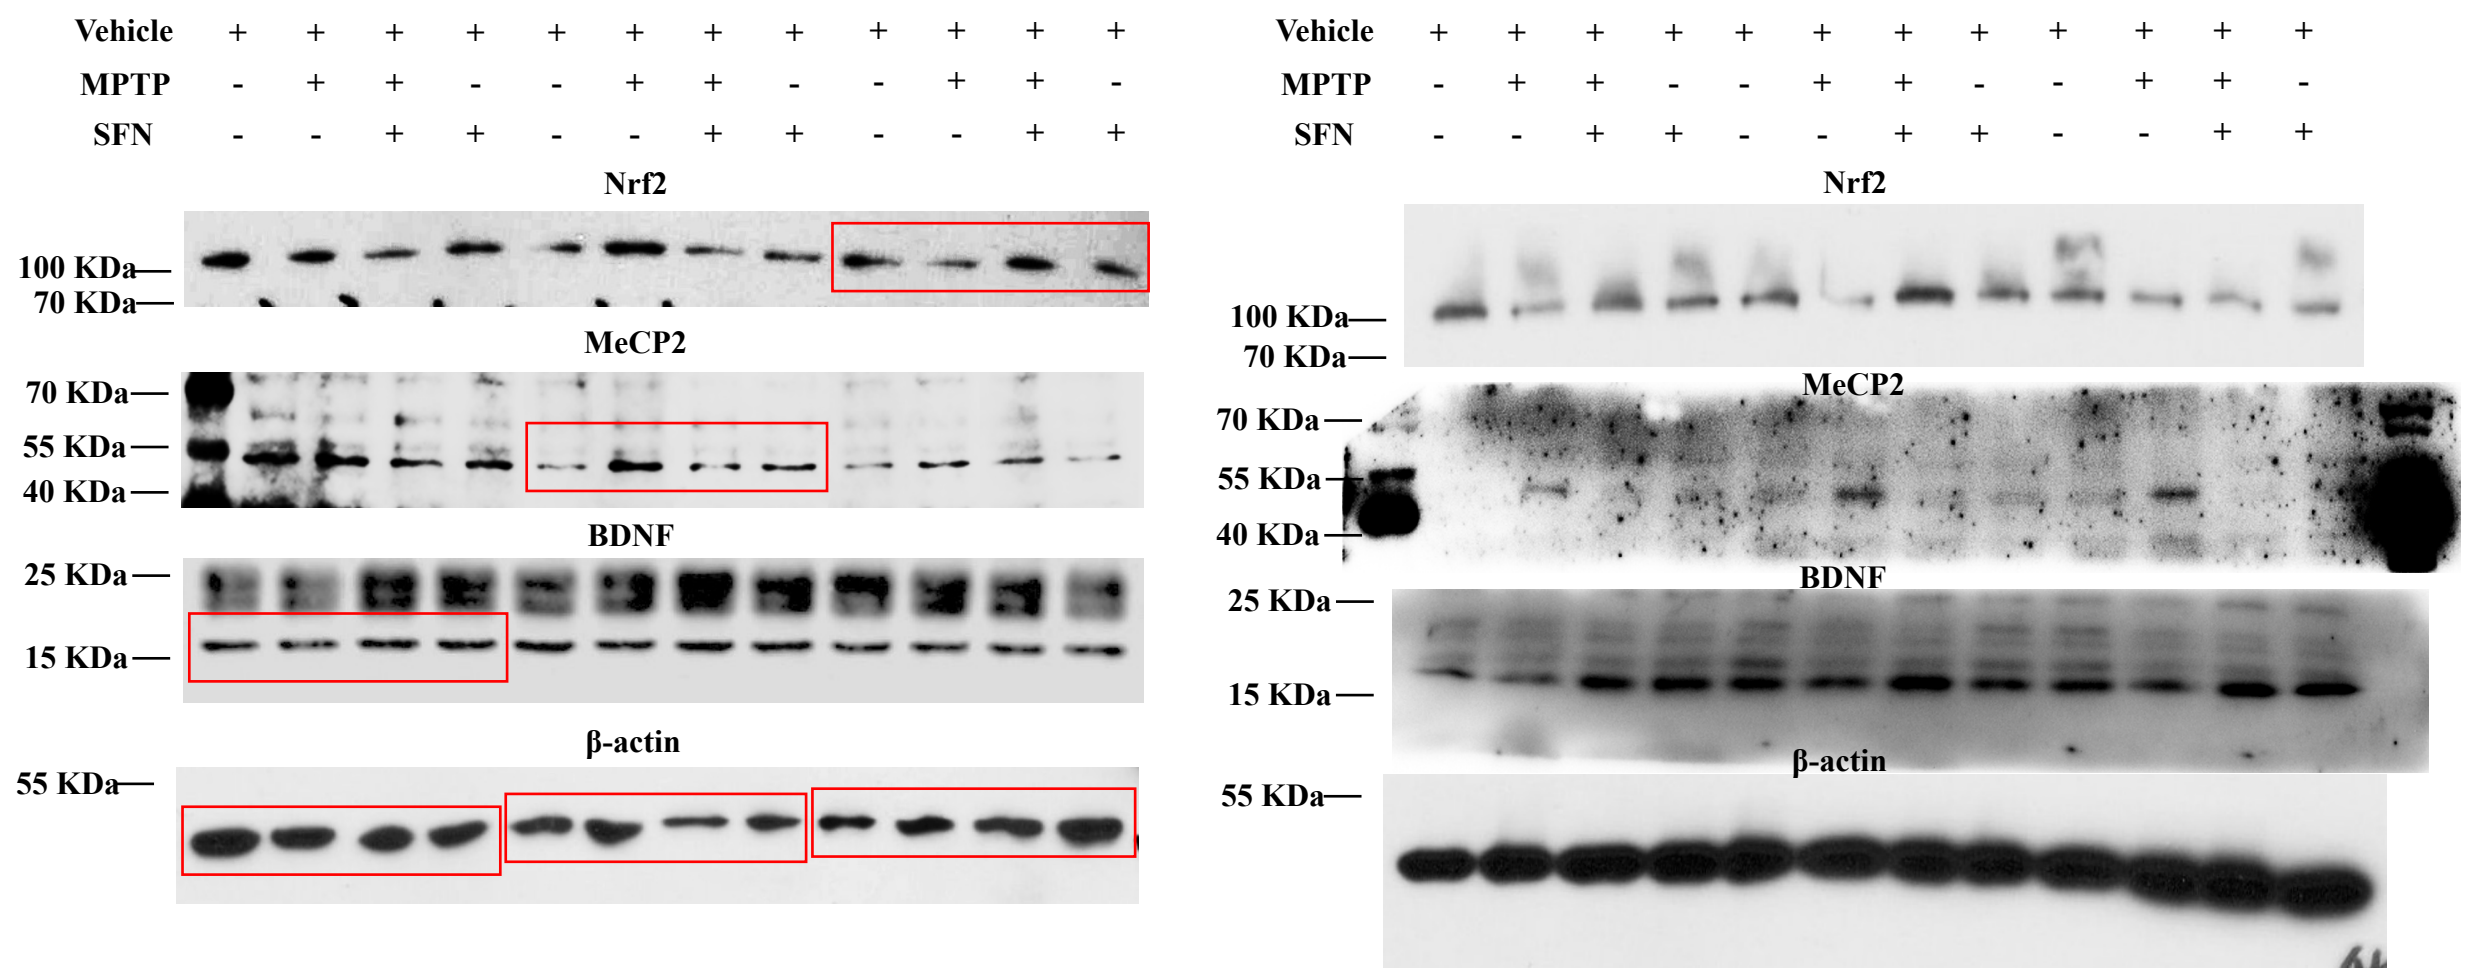

Figure 3G

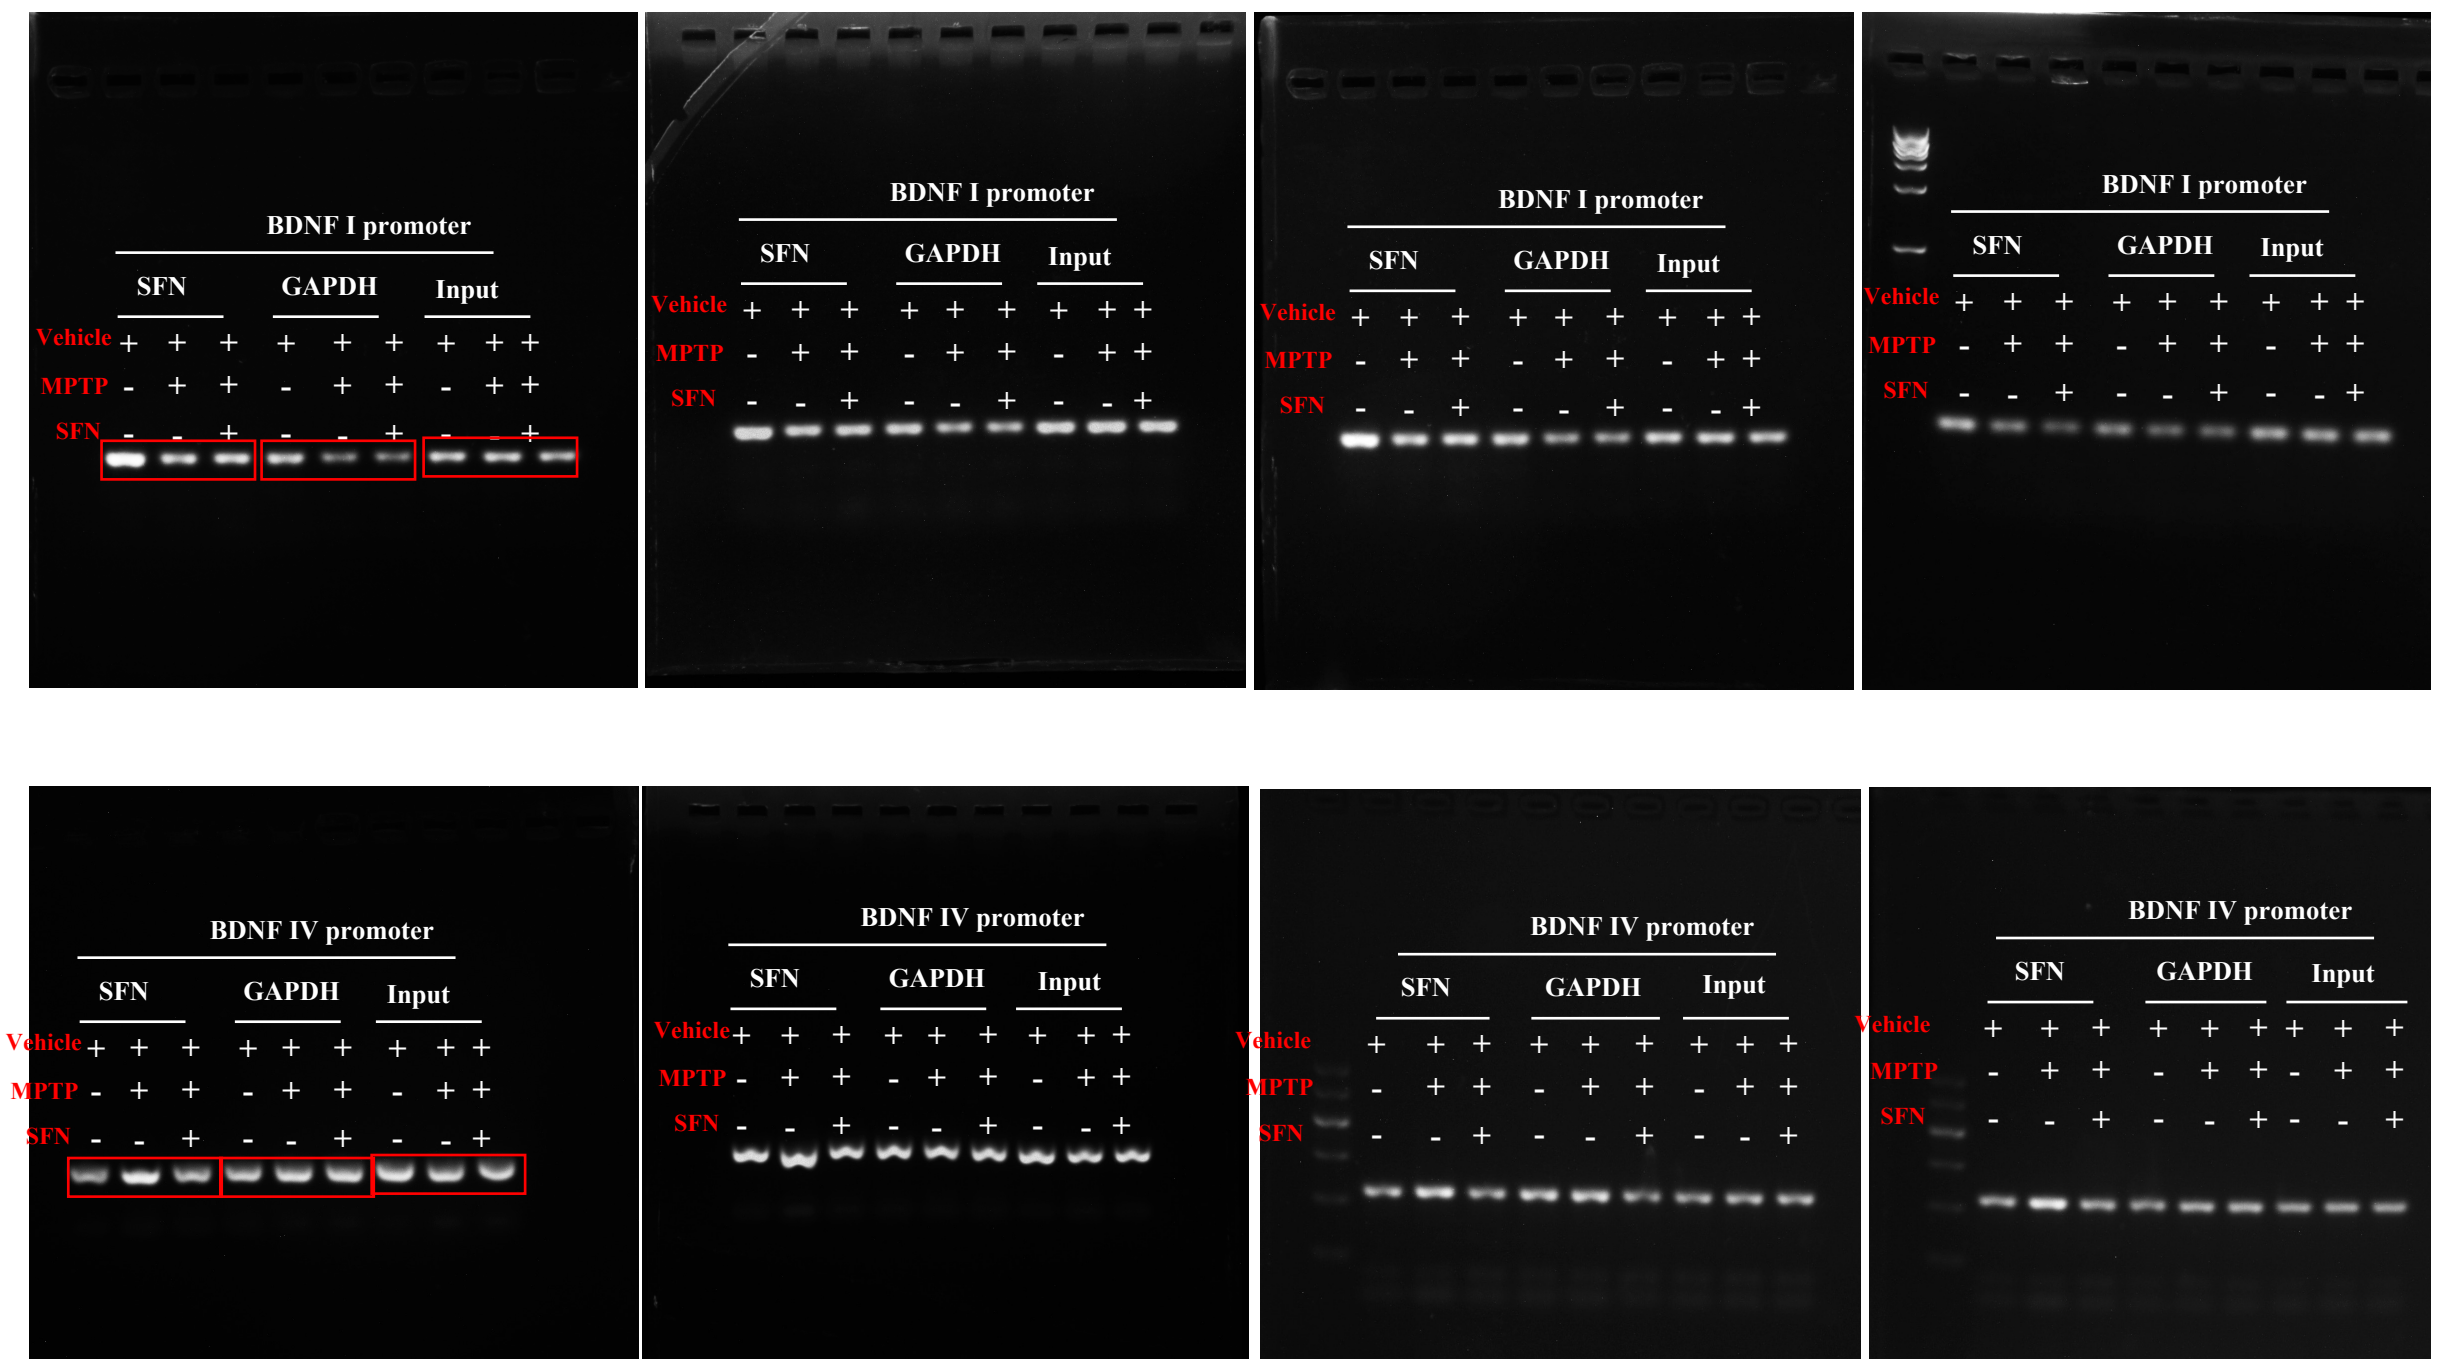

Figure 4B

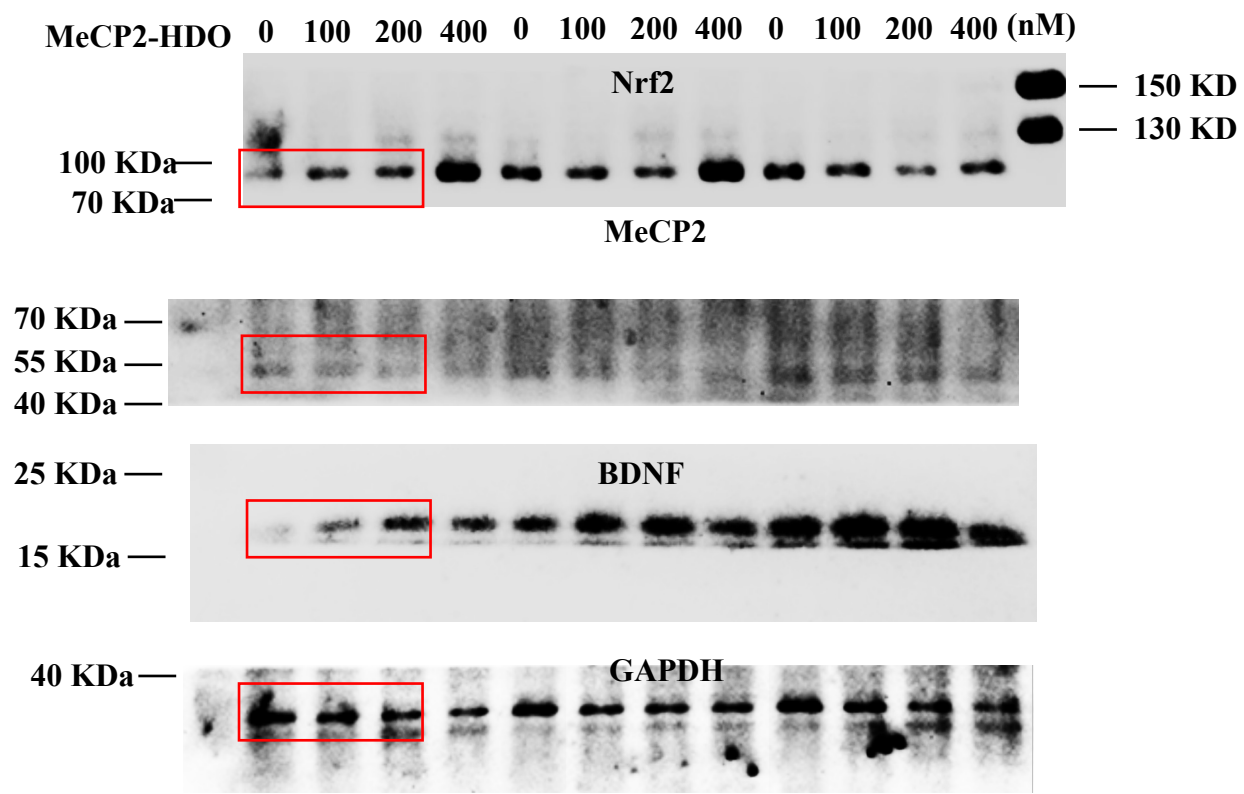

Figure 4C

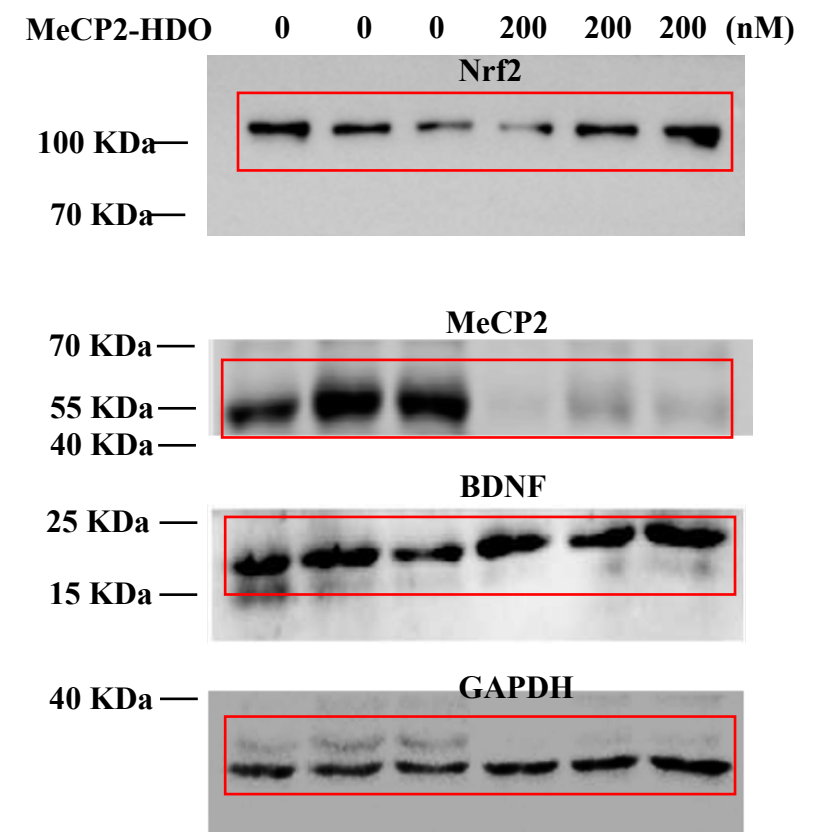



Figure 5G

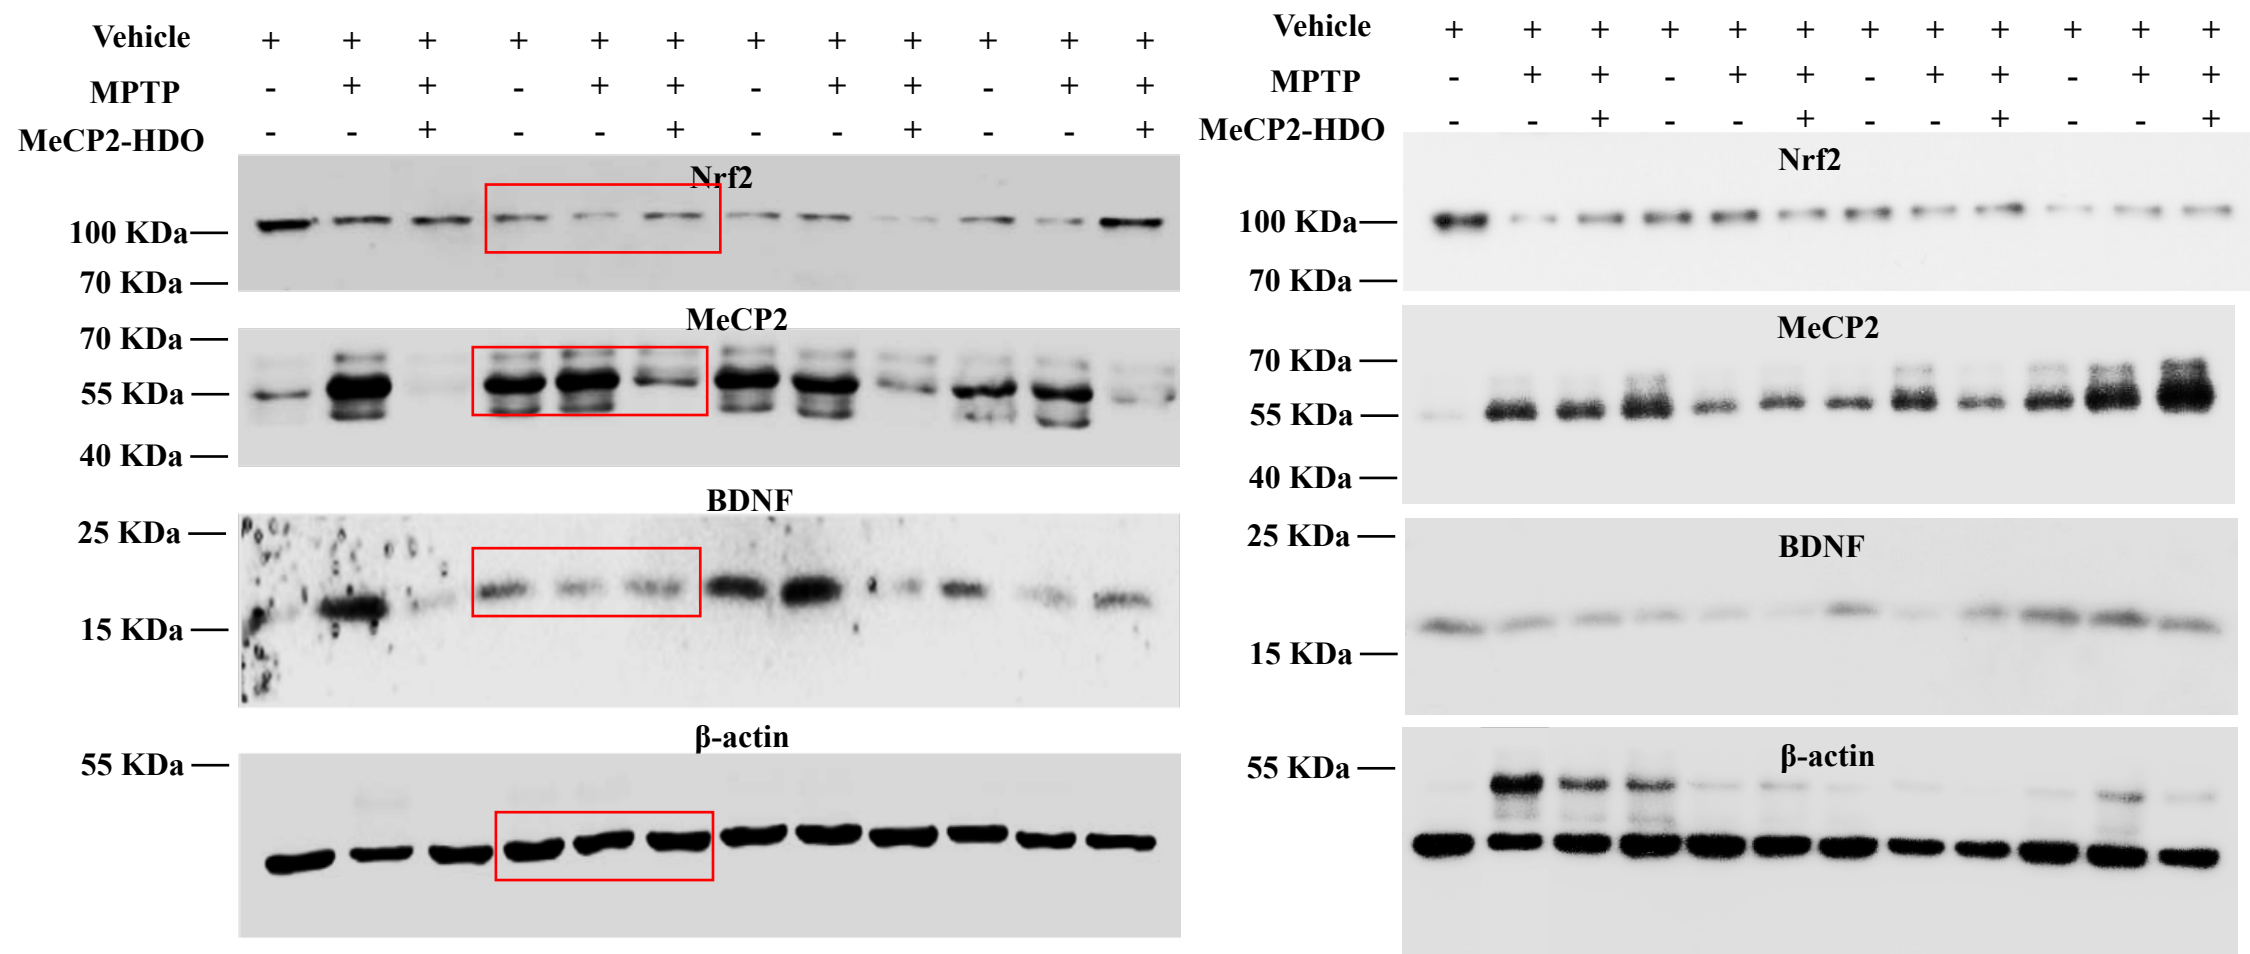

Figure 5H

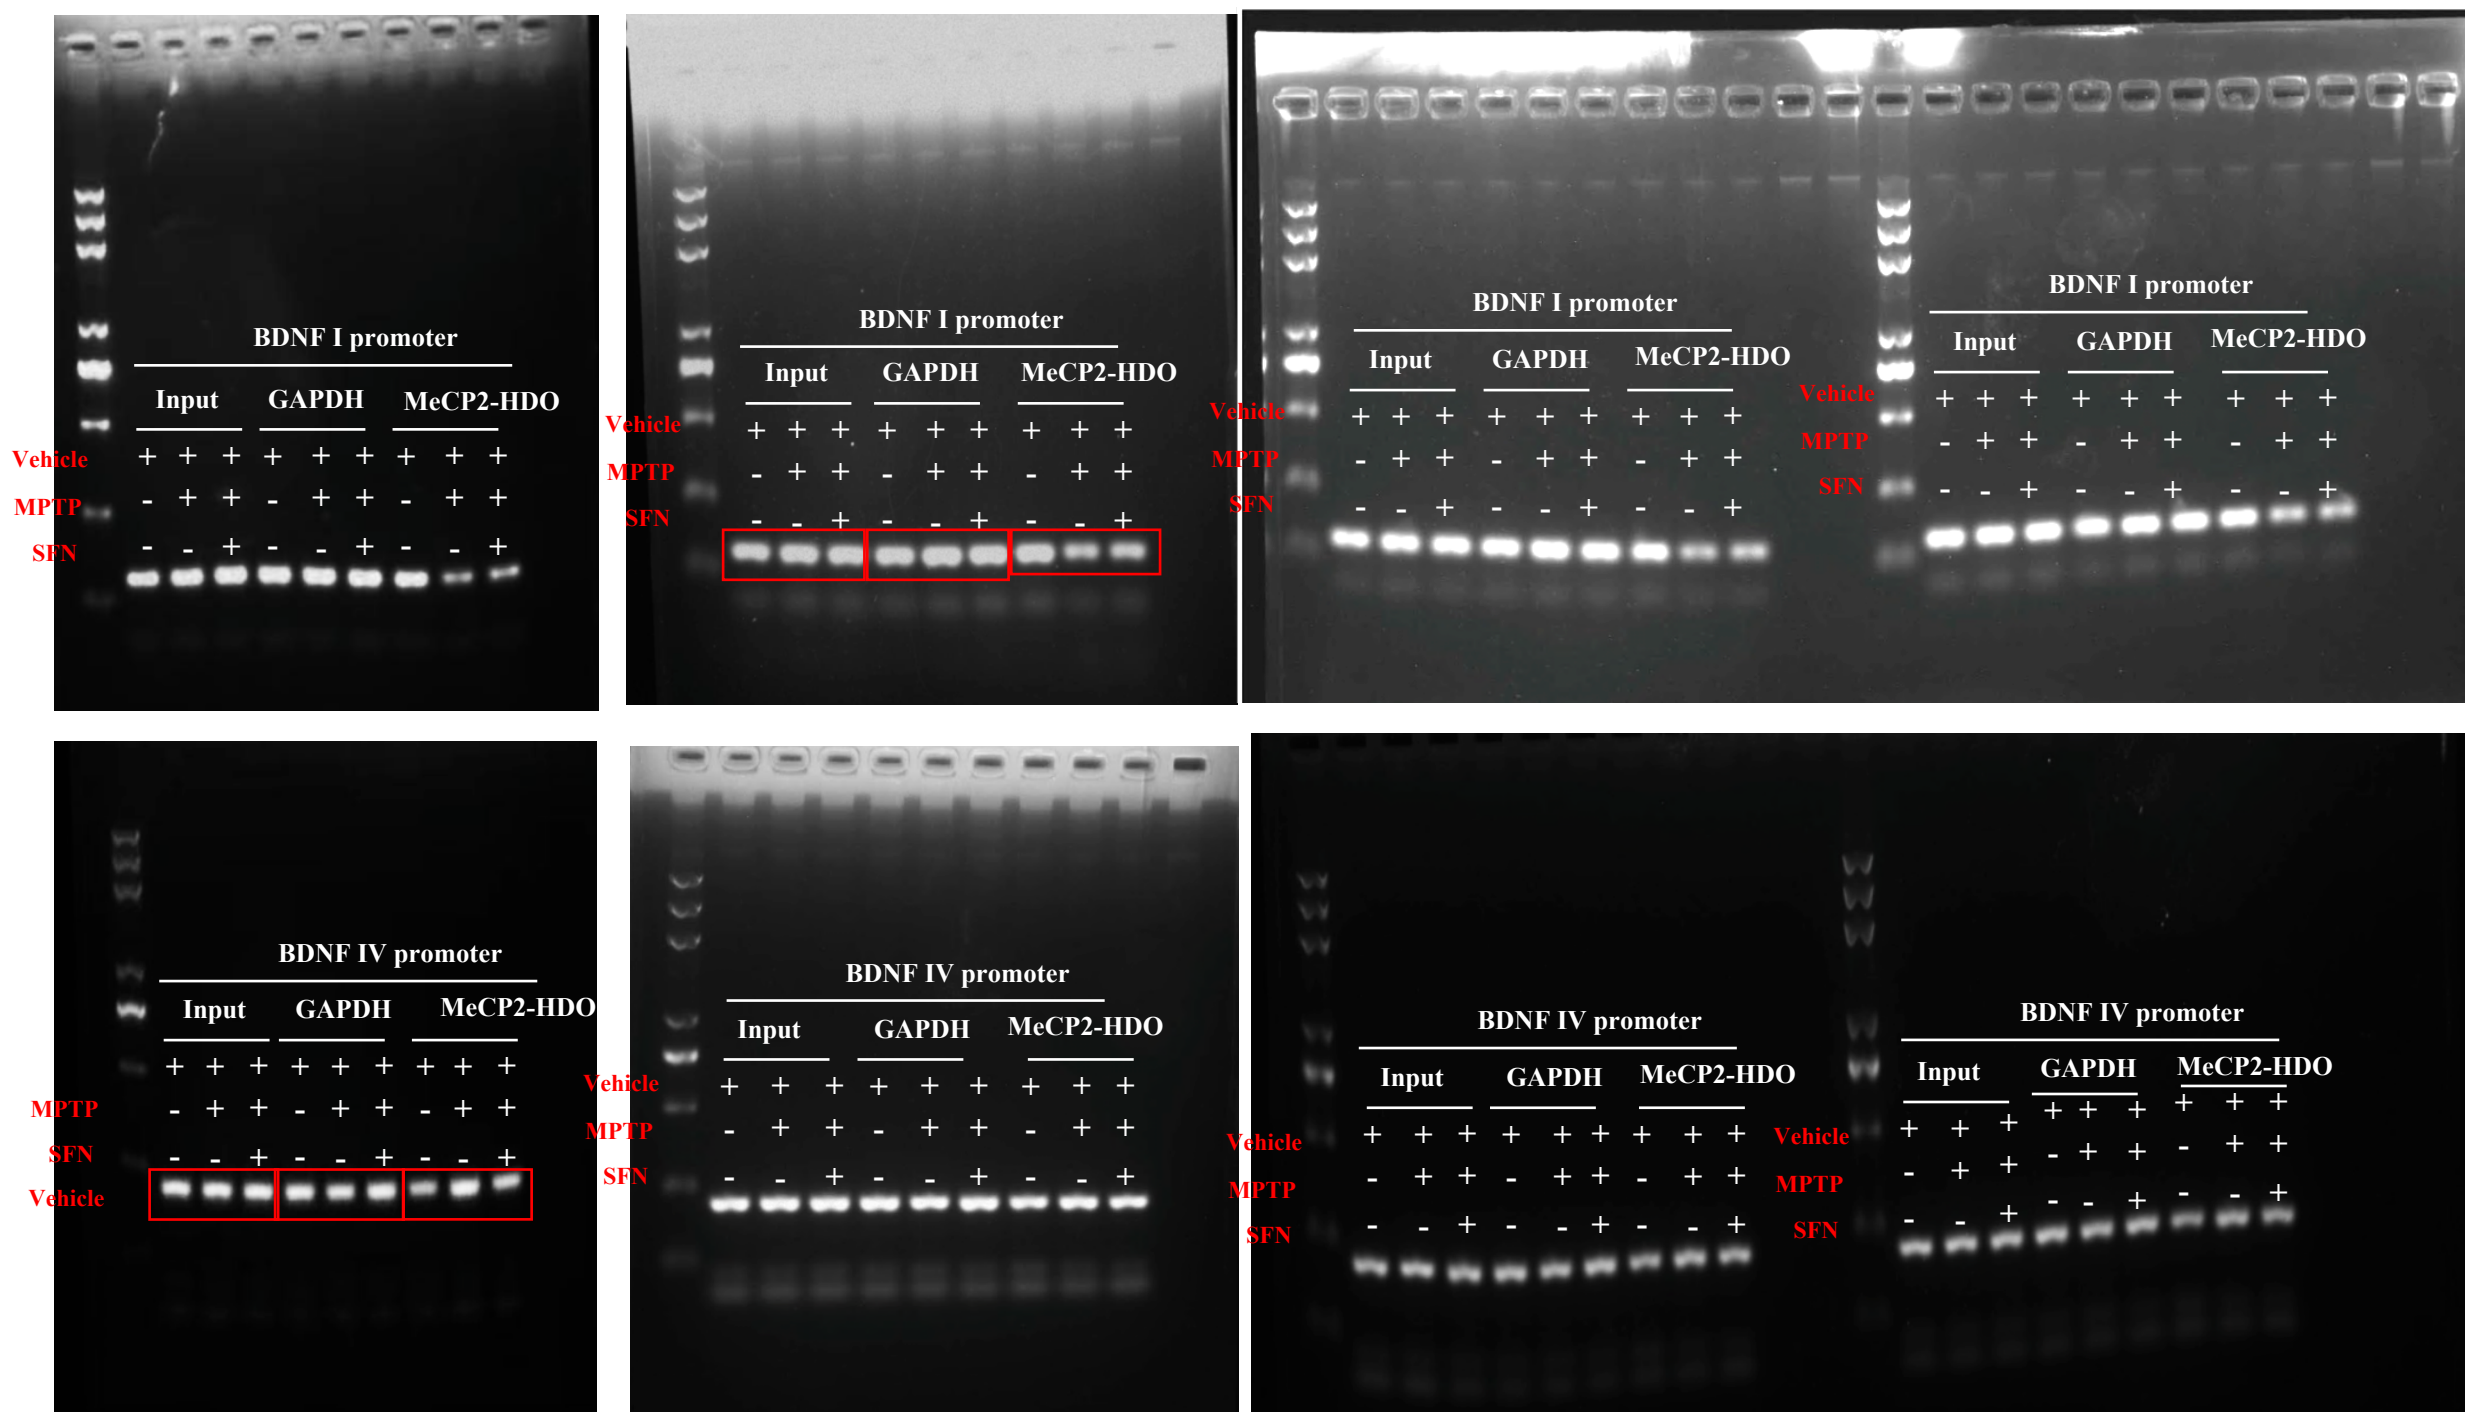

Figure 6A

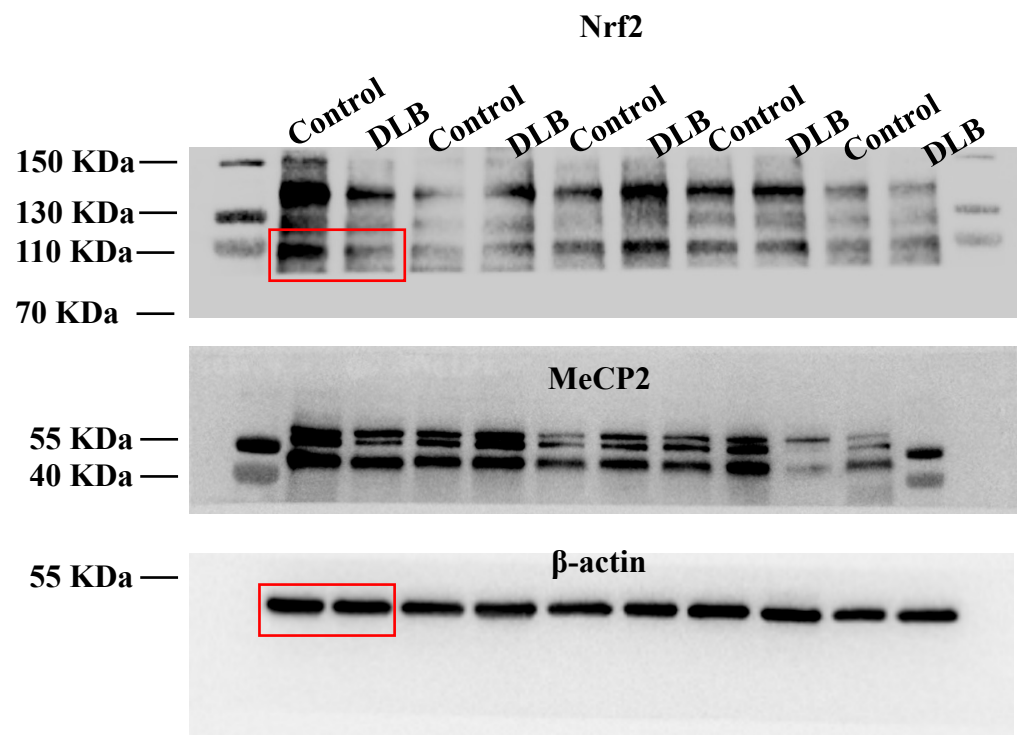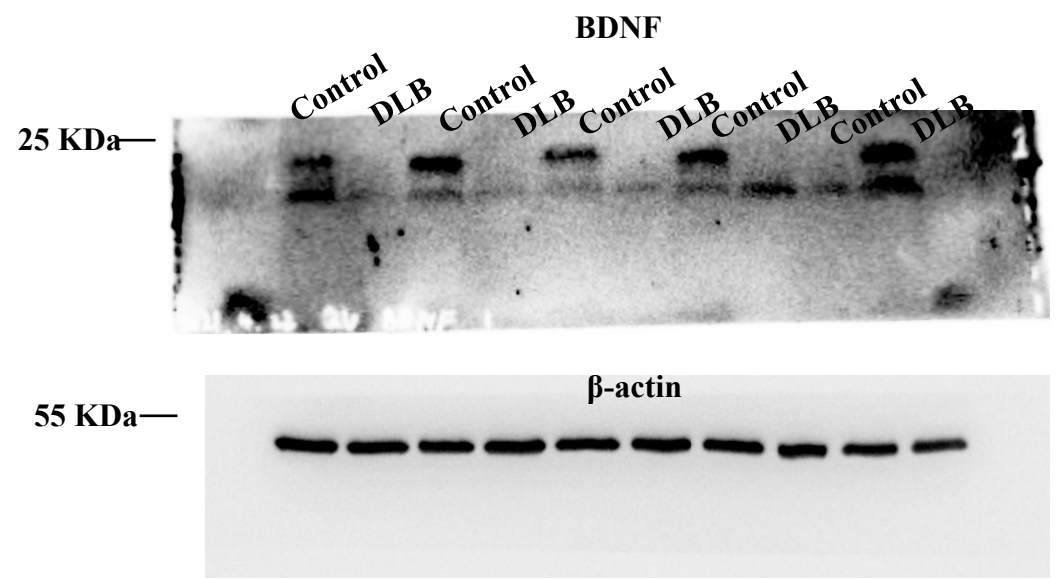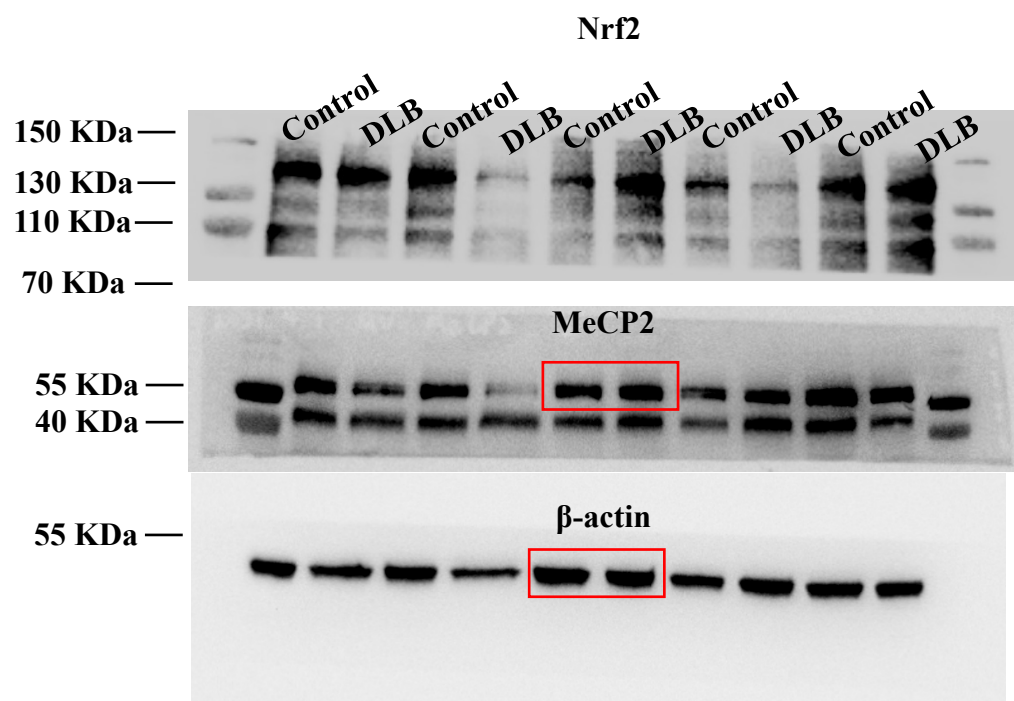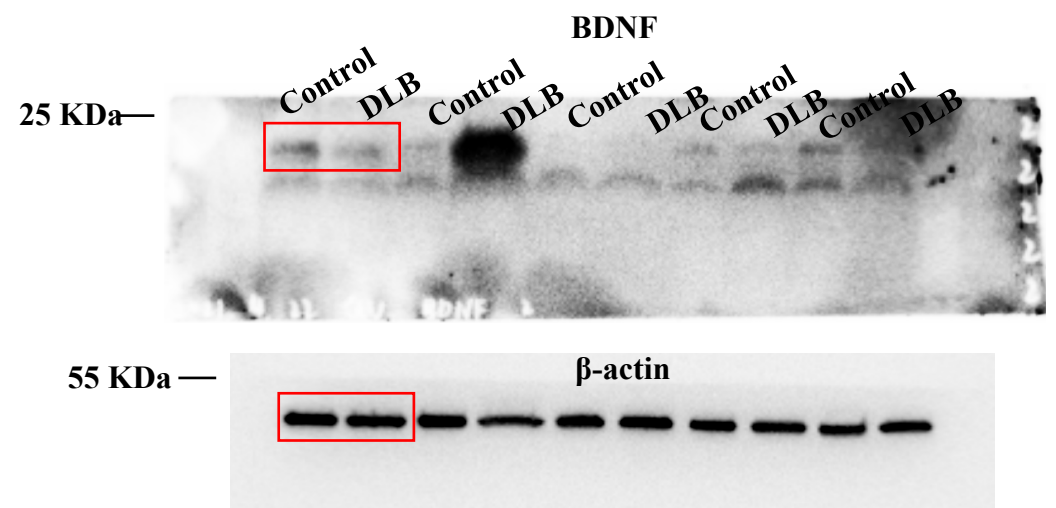

Supplement: 41420_2022_1063_MOESM1_ESM.pdf [file 41420_2022_1063_MOESM1_ESM.pdf]
